# Supplementary material
Source: PubMed Central journal article supplement (PMC5880495)
Supplement: 10.1194_P080333_jlr.P080333-1.pdf [file 10.1194_P080333_jlr.P080333-1.pdf]

Supplemental Information:

An exome-wide sequencing study of lipid response to high-fat meal and fenofibrate in Caucasians: the GOLDN cohort

Xin Geng<sup>1</sup>, Ryan Irvin<sup>2</sup>, Bertha Hidalgo<sup>2</sup>, Stella Aslibekyan<sup>2</sup>, Vinodh Srinivasasainagendra<sup>3</sup>, Ping An<sup>4</sup>, Alexis C. Frazier-Wood<sup>5</sup>, Hemant K. Tiwari<sup>3</sup>, Tushar Dave<sup>6</sup>, Kathleen Ryan<sup>6</sup>, Jose M. Ordovas<sup>7,8,9</sup>, Robert J. Straka<sup>10</sup>, Mary F. Feitosa<sup>4</sup>, Paul N. Hopkins<sup>11</sup>, Ingrid Borecki<sup>12</sup>, Michael A. Province<sup>4</sup>, Braxton D. Mitchell<sup>6</sup>, Donna K. Arnett<sup>\*13</sup>, Degui Zhi<sup>\*1,14</sup>

<sup>1</sup> School of Biomedical Informatics, The University of Texas Health Science Center at Houston, Houston, TX, 77030, USA

<sup>2</sup> Department of Epidemiology, University of Alabama at Birmingham, Birmingham, AL, 35233, USA

<sup>3</sup> Department of Biostatistics, University of Alabama at Birmingham, Birmingham, AL, 35233, USA

<sup>4</sup> Division of Statistical Genomics, Department of Genetics, Washington University School of Medicine, St. Louis, MO, USA.

<sup>5</sup> USDA/ARS Children's Nutrition Research Center, Baylor College of Medicine, Houston, TX, 77030, USA.

<sup>6</sup> Department of Medicine, Division of Endocrinology, Diabetes and Nutrition, University of Maryland School of Medicine, Baltimore, MD, 21201, USA.

<sup>7</sup> Nutrition and Genomics Laboratory, Jean Mayer United States Department of Agriculture Human Nutrition Research Center on Aging at Tufts University, Boston, MA, 02111, USA.

<sup>8</sup> IMDEA Alimentacion, Madrid, 28049, Spain

<sup>9</sup> Centro Nacional Investigaciones Cardiovasculares, Madrid, 28029, Spain

<sup>10</sup> Department of Experimental and Clinical Pharmacology Minneapolis, University of Minnesota, MN, 55455, USA

<sup>11</sup> Division of Cardiovascular Medicine, University of Utah, Salt Lake City, UT, 84112, USA

<sup>12</sup> Genetic Analysis Center, Department of Biostatistics, University of Washington, Seattle, WA, 98105, USA.

<sup>13</sup> College of Public Health, University of Kentucky, Lexington, KY, 40506, USA

<sup>14</sup> School of Public Health, The University of Texas Health Science Center at Houston, Houston, TX, 77030, USA

\* corresponding author:

Donna K. Arnett: [donna.arnett@uky.edu](mailto:donna.arnett@uky.edu)

Degui Zhi: [Degui.Zhi@uth.tmc.edu](mailto:Degui.Zhi@uth.tmc.edu)

Supplemental Figure S1. Average read depth of each exonic SNP.

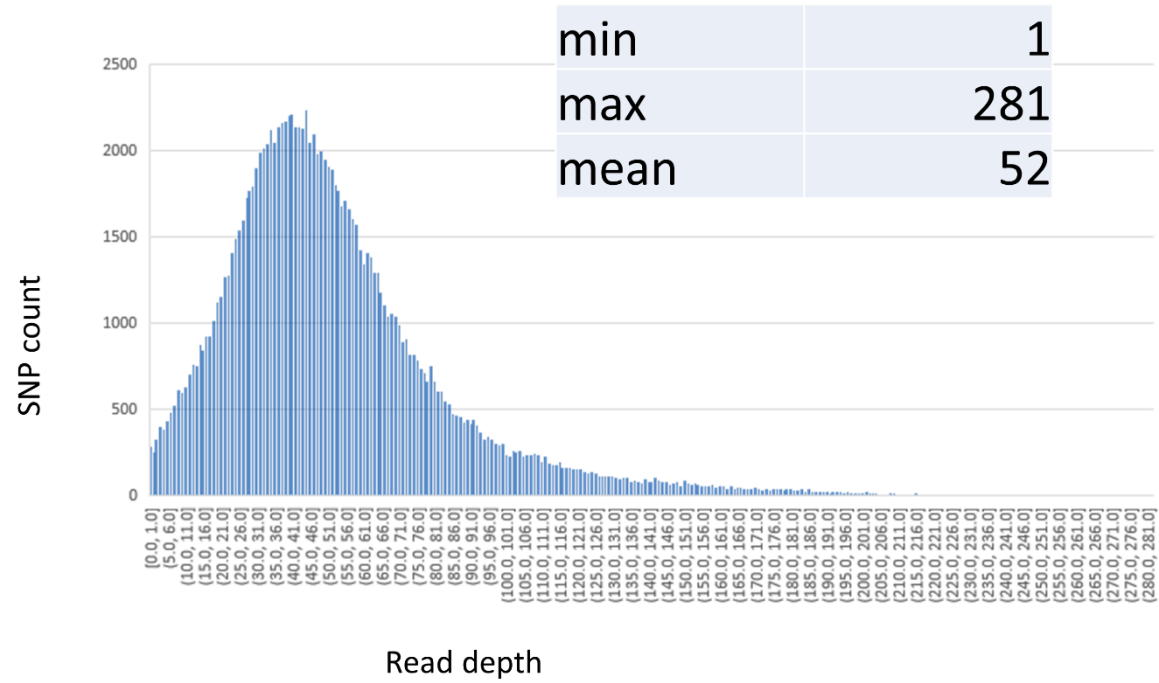

Supplemental Table S1: Regression models used in the analyses.

|                                                                                                    |
|----------------------------------------------------------------------------------------------------|
| <b>Full model</b>                                                                                  |
| baseline ~ covariates + SNP                                                                        |
| fenofibrate-response ~ baseline + covariates + SNP                                                 |
| postprandial clearance ~ value at draw2 + covariates + SNP                                         |
| postprandial uptake ~ baseline + covariates + SNP                                                  |
| postprandial AUI ~ baseline + covariates + SNP                                                     |
| postprandial clearance response to FFB ~ clearance + fenofibrate-response + covariates + SNP       |
| postprandial uptake response to response to FFB ~ uptake + fenofibrate-response + covariates + SNP |
| postprandial AUI response to FFB ~ AUI + fenofibrate-response + covariates + SNP                   |
| <b>Minimal model</b>                                                                               |
| baseline ~ covariates + SNP                                                                        |
| fenofibrate-response ~ covariates + SNP                                                            |
| postprandial clearance ~ covariates + SNP                                                          |
| postprandial uptake ~ covariates + SNP                                                             |
| postprandial AUI ~ covariates + SNP                                                                |
| postprandial clearance response to FFB ~ covariates + SNP                                          |
| postprandial uptake response to response to FFB ~ covariates + SNP                                 |
| postprandial AUI response to FFB ~ covariates + SNP                                                |

Covariates included sex, age, age<sup>2</sup>, age<sup>3</sup>, and recruiting center. For post-fenofibrate phenotypes, covariates also included pills per day in addition to those covariates. The postprandial phenotype response to FFB were the values of post-fenofibrate treatment subtracted by the values of pre-fenofibrate treatment. For example, postprandial AUI response to FFB = post-fenofibrate AUI – pre-fenofibrate AUI.

Supplemental Table S2: Demographic and clinical characteristics of samples in GOLDN, and HAPI Heart Study.

|                                 | GOLDN                  | HAPI Heart Study       |
|---------------------------------|------------------------|------------------------|
| gender                          | male:435<br>female:459 | male:404<br>female:366 |
| age                             | 50.2 ± 6.1             | 43.50 ± 13.90          |
| BMI(kg/m <sup>2</sup> )         | 28.5 ± 5.6             | 26.62 ± 4.46           |
| LDL 0h (mg/dL)                  | 122.77 ± 31.88         | —                      |
| HDL 0h (mg/dL)                  | 46.73 ± 13.06          | —                      |
| TG 0h (mg/dL)                   | 139.34 ± 97.63         | 68.56 ± 41.37          |
| Glucose (mg/dL)                 | 101.51 ± 18.74         | —                      |
| Systolic blood pressure (mmHg)  | 116.08 ± 16.82         | 121.5 ± 0.7            |
| Diastolic blood pressure (mmHg) | 68.57 ± 9.6            | 76.75 ± 0.4            |

Supplemental Table S3 Single variant association test for candidate genes whose common variants were found to be associated with lipid response phenotypes in previous GOLDN study

| Chr | Position  | Reference allele | Alternative allele | Number of samples analyzed | Alternative allele frequency | Effect size direction | Phenotype variance explained | P-Value  | Trait                             | Gene  |
|-----|-----------|------------------|--------------------|----------------------------|------------------------------|-----------------------|------------------------------|----------|-----------------------------------|-------|
| 11  | 116662407 | G                | C                  | 885                        | 0.052542                     | +                     | 0.017992                     | 6.60E-05 | TG baseline                       | APOA5 |
| 19  | 45411941  | T                | C                  | 764                        | 0.169503                     | +                     | 0.019979                     | 9.35E-05 | LDL fasting level response to FFB | APOE  |
| 11  | 116662407 | G                | C                  | 782                        | 0.056266                     | -                     | 1.23E-02                     | 0.001906 | TG fasting level response to FFB  | APOA5 |
| 11  | 116661001 | G                | A                  | 890                        | 0.000562                     | +                     | 0.008184                     | 0.006958 | TG baseline                       | APOA5 |
| 11  | 116662407 | G                | C                  | 782                        | 0.056266                     | +                     | 0.008108                     | 0.0118   | HDL fasting level response to FFB | APOA5 |
| 11  | 116662407 | G                | C                  | 808                        | 0.054455                     | +                     | 0.007701                     | 0.012617 | TG clearance                      | APOA5 |
| 11  | 116662407 | G                | C                  | 885                        | 0.052542                     | -                     | 0.00661                      | 0.015576 | HDL baseline                      | APOA5 |
| 11  | 116662407 | G                | C                  | 782                        | 0.056266                     | +                     | 0.007291                     | 0.016953 | LDL fasting level response to FFB | APOA5 |
| 11  | 116660983 | T                | A                  | 815                        | 0.000613                     | +                     | 0.006112                     | 0.02562  | TG uptake                         | APOA5 |
| 19  | 45411941  | T                | C                  | 865                        | 0.165896                     | +                     | 0.005091                     | 0.035864 | LDL baseline                      | APOE  |
| 11  | 116660983 | T                | A                  | 789                        | 0.000634                     | -                     | 0.005364                     | 0.039667 | LDL fasting level response to FFB | APOA5 |
| 11  | 116660983 | T                | A                  | 815                        | 0.000613                     | +                     | 0.004336                     | 0.060121 | TG AUI                            | APOA5 |
| 11  | 116701353 | C                | T                  | 884                        | 0.000566                     | -                     | 0.003883                     | 0.06392  | TG baseline                       | APOC3 |
| 11  | 116661001 | G                | A                  | 890                        | 0.000562                     | -                     | 0.003784                     | 0.066472 | HDL baseline                      | APOA5 |
| 11  | 116660983 | T                | A                  | 815                        | 0.000613                     | -                     | 0.004053                     | 0.069135 | TG clearance                      | APOA5 |
| 19  | 45411110  | T                | C                  | 788                        | 0.005076                     | +                     | 0.003958                     | 0.077397 | TG clearance                      | APOE  |
| 19  | 45411941  | T                | C                  | 865                        | 0.165896                     | +                     | 0.003438                     | 0.084608 | TG baseline                       | APOE  |
| 11  | 116701353 | C                | T                  | 884                        | 0.000566                     | +                     | 0.003195                     | 0.09286  | HDL baseline                      | APOC3 |
| 11  | 116660983 | T                | A                  | 707                        | 0.000707                     | -                     | 0.00366                      | 0.107684 | TG AUI response to FFB            | APOA5 |

|    |           |   |   |     |          |   |          |          |                                      |       |
|----|-----------|---|---|-----|----------|---|----------|----------|--------------------------------------|-------|
| 11 | 116661001 | G | A | 787 | 0.000635 | + | 0.002951 | 0.127506 | HDL fasting level<br>response to FFB | APOA5 |
| 11 | 116661001 | G | A | 890 | 0.000562 | - | 0.002456 | 0.139278 | LDL baseline                         | APOA5 |
| 11 | 116703575 | G | C | 816 | 0.001225 | - | 0.002501 | 0.153117 | TG AUI                               | APOC3 |
| 11 | 116661001 | G | A | 813 | 0.000615 | + | 0.002457 | 0.157579 | TG clearance                         | APOA5 |
| 11 | 116703575 | G | C | 790 | 0.000633 | - | 0.002485 | 0.161165 | HDL fasting level<br>response to FFB | APOC3 |
| 11 | 116660983 | T | A | 892 | 0.000561 | - | 0.001817 | 0.203037 | TG baseline                          | APOA5 |
| 19 | 45411110  | T | C | 864 | 0.005787 | - | 0.001868 | 0.203881 | HDL baseline                         | APOE  |
| 11 | 116703561 | G | C | 894 | 0.001678 | - | 0.001723 | 0.214563 | HDL baseline                         | APOC3 |
| 19 | 45411110  | T | C | 763 | 0.004587 | + | 0.001944 | 0.223307 | LDL fasting level<br>response to FFB | APOE  |
| 11 | 116703575 | G | C | 708 | 0.000706 | - | 0.002039 | 0.229502 | TG clearance<br>response to FFB      | APOC3 |
| 11 | 116662407 | G | C | 700 | 0.056429 | + | 0.001971 | 0.240196 | TG clearance<br>response to FFB      | APOA5 |
| 11 | 116703575 | G | C | 708 | 0.000706 | - | 0.001818 | 0.256569 | TG uptake<br>response to FFB         | APOC3 |
| 11 | 116660983 | T | A | 789 | 0.000634 | - | 1.60E-03 | 0.260847 | TG fasting level<br>response to FFB  | APOA5 |
| 11 | 116662407 | G | C | 808 | 0.054455 | + | 0.001562 | 0.261226 | TG AUI                               | APOA5 |
| 19 | 45411941  | T | C | 865 | 0.165896 | - | 0.00145  | 0.262679 | HDL baseline                         | APOE  |
| 11 | 116703575 | G | C | 816 | 0.001225 | - | 0.001492 | 0.269892 | TG clearance                         | APOC3 |
| 19 | 45411941  | T | C | 790 | 0.164557 | + | 0.001522 | 0.272878 | TG clearance                         | APOE  |
| 19 | 45411941  | T | C | 764 | 0.169503 | - | 0.001537 | 0.278564 | HDL fasting level<br>response to FFB | APOE  |
| 11 | 116703575 | G | C | 893 | 0.00112  | + | 0.001226 | 0.295312 | HDL baseline                         | APOC3 |
| 11 | 116703575 | G | C | 816 | 0.001225 | - | 0.001278 | 0.3071   | TG uptake                            | APOC3 |
| 19 | 45411941  | T | C | 764 | 0.169503 | + | 0.001338 | 0.312013 | TG fasting level<br>response to FFB  | APOE  |
| 19 | 45411110  | T | C | 763 | 0.004587 | + | 0.001325 | 0.314738 | HDL fasting level<br>response to FFB | APOE  |

|    |           |   |   |     |          |   |          |          |                                      |       |
|----|-----------|---|---|-----|----------|---|----------|----------|--------------------------------------|-------|
| 11 | 116703575 | G | C | 893 | 0.00112  | - | 0.00107  | 0.328385 | TG baseline                          | APOC3 |
| 11 | 116701353 | C | T | 781 | 0.00064  | - | 0.001214 | 0.330222 | LDL fasting level<br>response to FFB | APOC3 |
| 19 | 454111110 | T | C | 682 | 0.003666 | + | 0.00137  | 0.33371  | TG clearance<br>response to FFB      | APOE  |
| 11 | 116660983 | T | A | 707 | 0.000707 | - | 0.001299 | 0.337852 | TG clearance<br>response to FFB      | APOA5 |
| 11 | 116701353 | C | T | 781 | 0.00064  | - | 0.00105  | 0.365117 | HDL fasting level<br>response to FFB | APOC3 |
| 19 | 454111110 | T | C | 864 | 0.005787 | + | 0.000889 | 0.380761 | LDL baseline                         | APOE  |
| 11 | 116703561 | G | C | 817 | 0.001224 | - | 0.000865 | 0.400512 | TG uptake                            | APOC3 |
| 19 | 45411941  | T | C | 684 | 0.166667 | + | 0.00098  | 0.412888 | TG clearance<br>response to FFB      | APOE  |
| 11 | 116703561 | G | C | 817 | 0.001224 | + | 0.000816 | 0.414244 | TG clearance                         | APOC3 |
| 11 | 116703575 | G | C | 790 | 0.000633 | + | 0.000788 | 0.430186 | TG fasting level<br>response to FFB  | APOC3 |
| 11 | 116703561 | G | C | 791 | 0.001264 | + | 0.000783 | 0.431323 | TG fasting level<br>response to FFB  | APOC3 |
| 11 | 116662407 | G | C | 885 | 0.052542 | + | 0.000535 | 0.491532 | LDL baseline                         | APOA5 |
| 11 | 116703575 | G | C | 708 | 0.000706 | - | 0.000639 | 0.501067 | TG AUI response<br>to FFB            | APOC3 |
| 11 | 116662407 | G | C | 700 | 0.056429 | + | 0.000613 | 0.512319 | TG AUI response<br>to FFB            | APOA5 |
| 11 | 116660983 | T | A | 789 | 0.000634 | + | 0.000525 | 0.519923 | HDL fasting level<br>response to FFB | APOA5 |
| 19 | 454111110 | T | C | 864 | 0.005787 | + | 0.000475 | 0.521623 | TG baseline                          | APOE  |
| 11 | 116661001 | G | A | 705 | 0.000709 | - | 0.000515 | 0.546985 | TG uptake<br>response to FFB         | APOA5 |
| 11 | 116703561 | G | C | 817 | 0.001224 | - | 0.000424 | 0.556186 | TG AUI                               | APOC3 |
| 19 | 454111110 | T | C | 763 | 0.004587 | + | 0.000451 | 0.55731  | TG fasting level<br>response to FFB  | APOE  |
| 11 | 116661001 | G | A | 787 | 0.000635 | + | 4.29E-04 | 0.561354 | TG fasting level<br>response to FFB  | APOA5 |

|    |           |   |   |     |          |   |          |          |                                      |       |
|----|-----------|---|---|-----|----------|---|----------|----------|--------------------------------------|-------|
| 11 | 116703561 | G | C | 894 | 0.001678 | - | 0.000323 | 0.591086 | LDL baseline                         | APOC3 |
| 11 | 116701353 | C | T | 884 | 0.000566 | - | 0.000312 | 0.599513 | LDL baseline                         | APOC3 |
| 11 | 116703575 | G | C | 893 | 0.00112  | - | 0.000301 | 0.604023 | LDL baseline                         | APOC3 |
| 11 | 116662407 | G | C | 808 | 0.054455 | + | 0.000325 | 0.608071 | TG uptake                            | APOA5 |
| 11 | 116703561 | G | C | 791 | 0.001264 | + | 0.000323 | 0.613145 | LDL fasting level<br>response to FFB | APOC3 |
| 19 | 45411110  | T | C | 682 | 0.003666 | + | 0.000374 | 0.613355 | TG AUI response<br>to FFB            | APOE  |
| 19 | 45411110  | T | C | 788 | 0.005076 | + | 0.000234 | 0.66776  | TG AUI                               | APOE  |
| 19 | 45411941  | T | C | 684 | 0.166667 | - | 0.000255 | 0.676017 | TG uptake<br>response to FFB         | APOE  |
| 11 | 116660983 | T | A | 892 | 0.000561 | - | 0.000149 | 0.715625 | LDL baseline                         | APOA5 |
| 11 | 116661001 | G | A | 813 | 0.000615 | - | 0.000147 | 0.729661 | TG uptake                            | APOA5 |
| 11 | 116661001 | G | A | 787 | 0.000635 | + | 0.000131 | 0.747714 | LDL fasting level<br>response to FFB | APOA5 |
| 11 | 116703561 | G | C | 709 | 0.000705 | + | 0.000133 | 0.758373 | TG AUI response<br>to FFB            | APOC3 |
| 11 | 116660983 | T | A | 892 | 0.000561 | - | 0.000103 | 0.762318 | HDL baseline                         | APOA5 |
| 11 | 116703561 | G | C | 709 | 0.000705 | + | 0.000108 | 0.781578 | TG clearance<br>response to FFB      | APOC3 |
| 19 | 45411941  | T | C | 790 | 0.164557 | - | 8.64E-05 | 0.793912 | TG uptake                            | APOE  |
| 11 | 116661001 | G | A | 705 | 0.000709 | + | 9.30E-05 | 0.797914 | TG AUI response<br>to FFB            | APOA5 |
| 11 | 116703561 | G | C | 894 | 0.001678 | + | 7.32E-05 | 0.798134 | TG baseline                          | APOC3 |
| 11 | 116703575 | G | C | 790 | 0.000633 | + | 8.09E-05 | 0.800372 | LDL fasting level<br>response to FFB | APOC3 |
| 11 | 116660983 | T | A | 707 | 0.000707 | + | 7.74E-05 | 0.814984 | TG uptake<br>response to FFB         | APOA5 |
| 19 | 45411941  | T | C | 684 | 0.166667 | + | 6.43E-05 | 0.833831 | TG AUI response<br>to FFB            | APOE  |
| 11 | 116703561 | G | C | 791 | 0.001264 | - | 5.42E-05 | 0.835961 | HDL fasting level<br>response to FFB | APOC3 |



|    |           |   |   |     |          |   |          |          |                                     |       |
|----|-----------|---|---|-----|----------|---|----------|----------|-------------------------------------|-------|
| 11 | 116661001 | G | A | 705 | 0.000709 | - | 5.39E-05 | 0.845436 | TG clearance<br>response to FFB     | APOA5 |
| 11 | 116701353 | C | T | 781 | 0.00064  | + | 4.44E-05 | 0.852299 | TG fasting level<br>response to FFB | APOC3 |
| 11 | 116662407 | G | C | 700 | 0.056429 | + | 4.09E-05 | 0.865681 | TG uptake<br>response to FFB        | APOA5 |
| 11 | 116661001 | G | A | 813 | 0.000615 | - | 2.71E-05 | 0.882057 | TG AUI                              | APOA5 |
| 19 | 45411110  | T | C | 788 | 0.005076 | - | 2.07E-05 | 0.898277 | TG uptake                           | APOE  |
| 19 | 45411941  | T | C | 790 | 0.164557 | + | 2.01E-05 | 0.899607 | TG AUI                              | APOE  |
| 19 | 45411110  | T | C | 682 | 0.003666 | + | 1.19E-05 | 0.928248 | TG uptake<br>response to FFB        | APOE  |
| 11 | 116703561 | G | C | 709 | 0.000705 | - | 3.86E-06 | 0.958301 | TG uptake<br>response to FFB        | APOC3 |

Supplemental Table S4 Gene-based association test for candidate genes whose common variants were found to be associated with lipid response phenotypes in previous GOLDN study

| Group name | Number of variants | Variant position                                           | Minor alleles of frequencies              | Single variant P-values             | Gene based P-value | Method | Minor allele frequency threshold | Trait                             |
|------------|--------------------|------------------------------------------------------------|-------------------------------------------|-------------------------------------|--------------------|--------|----------------------------------|-----------------------------------|
| APOA5      | 2                  | 11:116660983:T:A;<br>11:116661001:G:A                      | 0.000560538,<br>0.000561798               | 0.203037,<br>0.0069579              | 0.011655           | SKAT   | 0.05                             | TG baseline                       |
| APOA5      | 2                  | 11:116660983:T:A;<br>11:116661001:G:A                      | 0.000560538,<br>0.000561798               | 0.203037,<br>0.0069579              | 0.011655           | SKAT   | 0.01                             | TG baseline                       |
| APOA5      | 2                  | 11:116660983:T:A;<br>11:116661001:G:A                      | 0.000613497,<br>0.000615006               | 0.0691347,<br>0.157579              | 0.070623           | SKAT   | 0.05                             | TG clearance                      |
| APOA5      | 2                  | 11:116660983:T:A;<br>11:116661001:G:A                      | 0.000613497,<br>0.000615006               | 0.0691347,<br>0.157579              | 0.070623           | SKAT   | 0.01                             | TG clearance                      |
| APOA5      | 2                  | 11:116660983:T:A;<br>11:116661001:G:A                      | 0.000613497,<br>0.000615006               | 0.0256204,<br>0.729661              | 0.078039           | SKAT   | 0.05                             | TG uptake                         |
| APOA5      | 2                  | 11:116660983:T:A;<br>11:116661001:G:A                      | 0.000613497,<br>0.000615006               | 0.0256204,<br>0.729661              | 0.078039           | SKAT   | 0.01                             | TG uptake                         |
| APOC3      | 3                  | 11:116701353:C:T;<br>11:116703561:G:C;<br>11:116703575:G:C | 0.000565611,<br>0.00167785,<br>0.00111982 | 0.0639202,<br>0.798134,<br>0.328385 | 0.10998            | MB     | 0.05                             | TG baseline                       |
| APOC3      | 3                  | 11:116701353:C:T;<br>11:116703561:G:C;<br>11:116703575:G:C | 0.000565611,<br>0.00167785,<br>0.00111982 | 0.0639202,<br>0.798134,<br>0.328385 | 0.10998            | MB     | 0.01                             | TG baseline                       |
| APOA5      | 2                  | 11:116660983:T:A;<br>11:116661001:G:A                      | 0.000633714,<br>0.000635324               | 0.0396668,<br>0.747714              | 0.114423           | SKAT   | 0.05                             | LDL fasting level response to FFB |
| APOA5      | 2                  | 11:116660983:T:A;<br>11:116661001:G:A                      | 0.000633714,<br>0.000635324               | 0.0396668,<br>0.747714              | 0.114423           | SKAT   | 0.01                             | LDL fasting level response to FFB |
| APOA5      | 2                  | 11:116660983:T:A;<br>11:116661001:G:A                      | 0.000633714,<br>0.000635324               | 0.519923,<br>0.127506               | 0.125074           | Burden | 0.05                             | HDL fasting level response to FFB |
| APOA5      | 2                  | 11:116660983:T:A;<br>11:116661001:G:A                      | 0.000633714,<br>0.000635324               | 0.519923,<br>0.127506               | 0.125074           | Burden | 0.01                             | HDL fasting level response to FFB |
| APOA5      | 2                  | 11:116660983:T:A;<br>11:116661001:G:A                      | 0.000633714,<br>0.000635324               | 0.519923,<br>0.127506               | 0.125172           | MB     | 0.05                             | HDL fasting level response to FFB |

|       |   |                                                            |                                            |                                    |          |        |      |                                      |
|-------|---|------------------------------------------------------------|--------------------------------------------|------------------------------------|----------|--------|------|--------------------------------------|
| APOA5 | 2 | 11:116660983:T:A;<br>11:116661001:G:A                      | 0.000633714,<br>0.000635324                | 0.519923,<br>0.127506              | 0.125172 | MB     | 0.01 | HDL fasting level response<br>to FFB |
| APOA5 | 2 | 11:116660983:T:A;<br>11:116661001:G:A                      | 0.000560538,<br>0.000561798                | 0.762318,<br>0.0664718             | 0.130345 | Burden | 0.05 | HDL baseline                         |
| APOA5 | 2 | 11:116660983:T:A;<br>11:116661001:G:A                      | 0.000560538,<br>0.000561798                | 0.762318,<br>0.0664718             | 0.130345 | Burden | 0.01 | HDL baseline                         |
| APOA5 | 2 | 11:116660983:T:A;<br>11:116661001:G:A                      | 0.000560538,<br>0.000561798                | 0.762318,<br>0.0664718             | 0.1305   | MB     | 0.05 | HDL baseline                         |
| APOA5 | 2 | 11:116660983:T:A;<br>11:116661001:G:A                      | 0.000560538,<br>0.000561798                | 0.762318,<br>0.0664718             | 0.1305   | MB     | 0.01 | HDL baseline                         |
| APOC3 | 2 | 11:116701353:C:T;<br>11:116703575:G:C                      | 0.000565611,<br>0.00111982                 | 0.0639202,<br>0.328385             | 0.130882 | VT     | 0.01 | TG baseline                          |
| APOC3 | 2 | 11:116701353:C:T;<br>11:116703575:G:C                      | 0.000565611,<br>0.00111982                 | 0.0928598,<br>0.295312             | 0.140301 | VT     | 0.01 | HDL baseline                         |
| APOC3 | 3 | 11:116701353:C:T;<br>11:116703561:G:C;<br>11:116703575:G:C | 0.000640205,<br>0.00126422,<br>0.000632911 | 0.365117,<br>0.835961,<br>0.161165 | 0.142182 | MB     | 0.05 | HDL fasting level response<br>to FFB |
| APOC3 | 3 | 11:116701353:C:T;<br>11:116703561:G:C;<br>11:116703575:G:C | 0.000640205,<br>0.00126422,<br>0.000632911 | 0.365117,<br>0.835961,<br>0.161165 | 0.142182 | MB     | 0.01 | HDL fasting level response<br>to FFB |
| APOC3 | 2 | 11:116703561:G:C;<br>11:116703575:G:C                      | 0.00122399,<br>0.00122549                  | 0.556186,<br>0.153117              | 0.151915 | Burden | 0.05 | TG AUI                               |
| APOC3 | 2 | 11:116703561:G:C;<br>11:116703575:G:C                      | 0.00122399,<br>0.00122549                  | 0.556186,<br>0.153117              | 0.151915 | Burden | 0.01 | TG AUI                               |
| APOC3 | 2 | 11:116703561:G:C;<br>11:116703575:G:C                      | 0.00122399,<br>0.00122549                  | 0.556186,<br>0.153117              | 0.151966 | MB     | 0.05 | TG AUI                               |
| APOC3 | 2 | 11:116703561:G:C;<br>11:116703575:G:C                      | 0.00122399,<br>0.00122549                  | 0.556186,<br>0.153117              | 0.151966 | MB     | 0.01 | TG AUI                               |
| APOA5 | 2 | 11:116660983:T:A;<br>11:116661001:G:A                      | 0.000613497,<br>0.000615006                | 0.0601213,<br>0.882057             | 0.16896  | SKAT   | 0.05 | TG AUI                               |
| APOA5 | 2 | 11:116660983:T:A;<br>11:116661001:G:A                      | 0.000613497,<br>0.000615006                | 0.0601213,<br>0.882057             | 0.16896  | SKAT   | 0.01 | TG AUI                               |

|       |   |                                                            |                                            |                                     |          |        |      |                                      |
|-------|---|------------------------------------------------------------|--------------------------------------------|-------------------------------------|----------|--------|------|--------------------------------------|
| APOC3 | 3 | 11:116701353:C:T;<br>11:116703561:G:C;<br>11:116703575:G:C | 0.000565611,<br>0.00167785,<br>0.00111982  | 0.0928598,<br>0.214563,<br>0.295312 | 0.170713 | SKAT   | 0.05 | HDL baseline                         |
| APOC3 | 3 | 11:116701353:C:T;<br>11:116703561:G:C;<br>11:116703575:G:C | 0.000565611,<br>0.00167785,<br>0.00111982  | 0.0928598,<br>0.214563,<br>0.295312 | 0.170713 | SKAT   | 0.01 | HDL baseline                         |
| APOA5 | 2 | 11:116660983:T:A;<br>11:116661001:G:A                      | 0.000560538,<br>0.000561798                | 0.762318,<br>0.0664718              | 0.177336 | SKAT   | 0.05 | HDL baseline                         |
| APOA5 | 2 | 11:116660983:T:A;<br>11:116661001:G:A                      | 0.000560538,<br>0.000561798                | 0.762318,<br>0.0664718              | 0.177336 | SKAT   | 0.01 | HDL baseline                         |
| APOA5 | 2 | 11:116660983:T:A;<br>11:116661001:G:A                      | 0.000613497,<br>0.000615006                | 0.0256204,<br>0.729661              | 0.181605 | MB     | 0.05 | TG uptake                            |
| APOA5 | 2 | 11:116660983:T:A;<br>11:116661001:G:A                      | 0.000613497,<br>0.000615006                | 0.0256204,<br>0.729661              | 0.181605 | MB     | 0.01 | TG uptake                            |
| APOA5 | 2 | 11:116660983:T:A;<br>11:116661001:G:A                      | 0.000613497,<br>0.000615006                | 0.0256204,<br>0.729661              | 0.181972 | Burden | 0.05 | TG uptake                            |
| APOA5 | 2 | 11:116660983:T:A;<br>11:116661001:G:A                      | 0.000613497,<br>0.000615006                | 0.0256204,<br>0.729661              | 0.181972 | Burden | 0.01 | TG uptake                            |
| APOC3 | 3 | 11:116701353:C:T;<br>11:116703561:G:C;<br>11:116703575:G:C | 0.000640205,<br>0.00126422,<br>0.000632911 | 0.365117,<br>0.835961,<br>0.161165  | 0.185653 | Burden | 0.05 | HDL fasting level response<br>to FFB |
| APOC3 | 3 | 11:116701353:C:T;<br>11:116703561:G:C;<br>11:116703575:G:C | 0.000640205,<br>0.00126422,<br>0.000632911 | 0.365117,<br>0.835961,<br>0.161165  | 0.185653 | Burden | 0.01 | HDL fasting level response<br>to FFB |
| APOC3 | 2 | 11:116703561:G:C;<br>11:116703575:G:C                      | 0.00122399,<br>0.00122549                  | 0.400512,<br>0.3071                 | 0.187232 | Burden | 0.05 | TG uptake                            |
| APOC3 | 2 | 11:116703561:G:C;<br>11:116703575:G:C                      | 0.00122399,<br>0.00122549                  | 0.400512,<br>0.3071                 | 0.187232 | Burden | 0.01 | TG uptake                            |
| APOC3 | 2 | 11:116703561:G:C;<br>11:116703575:G:C                      | 0.00122399,<br>0.00122549                  | 0.400512,<br>0.3071                 | 0.187244 | MB     | 0.05 | TG uptake                            |
| APOC3 | 2 | 11:116703561:G:C;<br>11:116703575:G:C                      | 0.00122399,<br>0.00122549                  | 0.400512,<br>0.3071                 | 0.187244 | MB     | 0.01 | TG uptake                            |
| APOA5 | 2 | 11:116660983:T:A;<br>11:116661001:G:A                      | 0.000560538,<br>0.000561798                | 0.715625,<br>0.139278               | 0.192215 | Burden | 0.05 | LDL baseline                         |

|       |   |                                                            |                                           |                                     |          |        |      |                                      |
|-------|---|------------------------------------------------------------|-------------------------------------------|-------------------------------------|----------|--------|------|--------------------------------------|
| APOA5 | 2 | 11:116660983:T:A;<br>11:116661001:G:A                      | 0.000560538,<br>0.000561798               | 0.715625,<br>0.139278               | 0.192215 | Burden | 0.01 | LDL baseline                         |
| APOA5 | 2 | 11:116660983:T:A;<br>11:116661001:G:A                      | 0.000560538,<br>0.000561798               | 0.715625,<br>0.139278               | 0.192366 | MB     | 0.05 | LDL baseline                         |
| APOA5 | 2 | 11:116660983:T:A;<br>11:116661001:G:A                      | 0.000560538,<br>0.000561798               | 0.715625,<br>0.139278               | 0.192366 | MB     | 0.01 | LDL baseline                         |
| APOA5 | 2 | 11:116660983:T:A;<br>11:116661001:G:A                      | 0.000633714,<br>0.000635324               | 0.519923,<br>0.127506               | 0.197549 | VT     | 0.01 | HDL fasting level response<br>to FFB |
| APOC3 | 3 | 11:116701353:C:T;<br>11:116703561:G:C;<br>11:116703575:G:C | 0.000565611,<br>0.00167785,<br>0.00111982 | 0.0639202,<br>0.798134,<br>0.328385 | 0.203458 | Burden | 0.05 | TG baseline                          |
| APOC3 | 3 | 11:116701353:C:T;<br>11:116703561:G:C;<br>11:116703575:G:C | 0.000565611,<br>0.00167785,<br>0.00111982 | 0.0639202,<br>0.798134,<br>0.328385 | 0.203458 | Burden | 0.01 | TG baseline                          |
| APOA5 | 2 | 11:116660983:T:A;<br>11:116661001:G:A                      | 0.000560538,<br>0.000561798               | 0.762318,<br>0.0664718              | 0.205309 | VT     | 0.01 | HDL baseline                         |
| APOA5 | 2 | 11:116660983:T:A;<br>11:116661001:G:A                      | 0.000633714,<br>0.000635324               | 0.0396668,<br>0.747714              | 0.21896  | MB     | 0.05 | LDL fasting level response<br>to FFB |
| APOA5 | 2 | 11:116660983:T:A;<br>11:116661001:G:A                      | 0.000633714,<br>0.000635324               | 0.0396668,<br>0.747714              | 0.21896  | MB     | 0.01 | LDL fasting level response<br>to FFB |
| APOC3 | 2 | 11:116701353:C:T;<br>11:116703575:G:C                      | 0.000640205,<br>0.000632911               | 0.365117,<br>0.161165               | 0.218966 | VT     | 0.01 | HDL fasting level response<br>to FFB |
| APOA5 | 2 | 11:116660983:T:A;<br>11:116661001:G:A                      | 0.000633714,<br>0.000635324               | 0.0396668,<br>0.747714              | 0.219361 | Burden | 0.05 | LDL fasting level response<br>to FFB |
| APOA5 | 2 | 11:116660983:T:A;<br>11:116661001:G:A                      | 0.000633714,<br>0.000635324               | 0.0396668,<br>0.747714              | 0.219361 | Burden | 0.01 | LDL fasting level response<br>to FFB |
| APOA5 | 2 | 11:116660983:T:A;<br>11:116661001:G:A                      | 0.000613497,<br>0.000615006               | 0.0601213,<br>0.882057              | 0.220165 | MB     | 0.05 | TG AUI                               |
| APOA5 | 2 | 11:116660983:T:A;<br>11:116661001:G:A                      | 0.000613497,<br>0.000615006               | 0.0601213,<br>0.882057              | 0.220165 | MB     | 0.01 | TG AUI                               |
| APOA5 | 2 | 11:116660983:T:A;<br>11:116661001:G:A                      | 0.000613497,<br>0.000615006               | 0.0601213,<br>0.882057              | 0.220497 | Burden | 0.05 | TG AUI                               |
| APOA5 | 2 | 11:116660983:T:A;<br>11:116661001:G:A                      | 0.000613497,<br>0.000615006               | 0.0601213,<br>0.882057              | 0.220497 | Burden | 0.01 | TG AUI                               |

|       |   |                                                            |                                            |                                     |          |        |      |                                      |
|-------|---|------------------------------------------------------------|--------------------------------------------|-------------------------------------|----------|--------|------|--------------------------------------|
| APOC3 | 2 | 11:116703561:G:C;<br>11:116703575:G:C                      | 0.00122399,<br>0.00122549                  | 0.556186,<br>0.153117               | 0.237561 | VT     | 0.01 | TG AUI                               |
| APOA5 | 2 | 11:116660983:T:A;<br>11:116661001:G:A                      | 0.000633714,<br>0.000635324                | 0.519923,<br>0.127506               | 0.254543 | SKAT   | 0.05 | HDL fasting level response<br>to FFB |
| APOA5 | 2 | 11:116660983:T:A;<br>11:116661001:G:A                      | 0.000633714,<br>0.000635324                | 0.519923,<br>0.127506               | 0.254543 | SKAT   | 0.01 | HDL fasting level response<br>to FFB |
| APOA5 | 2 | 11:116660983:T:A;<br>11:116661001:G:A                      | 0.000707214,<br>0.00070922                 | 0.107684,<br>0.797914               | 0.265327 | SKAT   | 0.05 | TG AUI response to FFB               |
| APOA5 | 2 | 11:116660983:T:A;<br>11:116661001:G:A                      | 0.000707214,<br>0.00070922                 | 0.107684,<br>0.797914               | 0.265327 | SKAT   | 0.01 | TG AUI response to FFB               |
| APOC3 | 2 | 11:116703561:G:C;<br>11:116703575:G:C                      | 0.00122399,<br>0.00122549                  | 0.400512,<br>0.3071                 | 0.287791 | VT     | 0.01 | TG uptake                            |
| APOA5 | 2 | 11:116660983:T:A;<br>11:116661001:G:A                      | 0.000560538,<br>0.000561798                | 0.715625,<br>0.139278               | 0.294304 | VT     | 0.01 | LDL baseline                         |
| APOC3 | 3 | 11:116701353:C:T;<br>11:116703561:G:C;<br>11:116703575:G:C | 0.000565611,<br>0.00167785,<br>0.00111982  | 0.0928598,<br>0.214563,<br>0.295312 | 0.294614 | MB     | 0.05 | HDL baseline                         |
| APOC3 | 3 | 11:116701353:C:T;<br>11:116703561:G:C;<br>11:116703575:G:C | 0.000565611,<br>0.00167785,<br>0.00111982  | 0.0928598,<br>0.214563,<br>0.295312 | 0.294614 | MB     | 0.01 | HDL baseline                         |
| APOC3 | 3 | 11:116701353:C:T;<br>11:116703561:G:C;<br>11:116703575:G:C | 0.000640205,<br>0.00126422,<br>0.000632911 | 0.852299,<br>0.431323,<br>0.430186  | 0.298186 | Burden | 0.05 | TG fasting level response<br>to FFB  |
| APOC3 | 3 | 11:116701353:C:T;<br>11:116703561:G:C;<br>11:116703575:G:C | 0.000640205,<br>0.00126422,<br>0.000632911 | 0.852299,<br>0.431323,<br>0.430186  | 0.298186 | Burden | 0.01 | TG fasting level response<br>to FFB  |
| APOC3 | 2 | 11:116703561:G:C;<br>11:116703575:G:C                      | 0.00122399,<br>0.00122549                  | 0.556186,<br>0.153117               | 0.299038 | SKAT   | 0.05 | TG AUI                               |
| APOC3 | 2 | 11:116703561:G:C;<br>11:116703575:G:C                      | 0.00122399,<br>0.00122549                  | 0.556186,<br>0.153117               | 0.299038 | SKAT   | 0.01 | TG AUI                               |
| APOC3 | 3 | 11:116701353:C:T;<br>11:116703561:G:C;<br>11:116703575:G:C | 0.000640205,<br>0.00126422,<br>0.000632911 | 0.852299,<br>0.431323,<br>0.430186  | 0.312202 | MB     | 0.05 | TG fasting level response<br>to FFB  |

|       |   |                                                            |                                            |                                     |          |        |      |                                     |
|-------|---|------------------------------------------------------------|--------------------------------------------|-------------------------------------|----------|--------|------|-------------------------------------|
| APOC3 | 3 | 11:116701353:C:T;<br>11:116703561:G:C;<br>11:116703575:G:C | 0.000640205,<br>0.00126422,<br>0.000632911 | 0.852299,<br>0.431323,<br>0.430186  | 0.312202 | MB     | 0.01 | TG fasting level response<br>to FFB |
| APOA5 | 2 | 11:116660983:T:A;<br>11:116661001:G:A                      | 0.000560538,<br>0.000561798                | 0.203037,<br>0.0069579              | 0.312956 | Burden | 0.05 | TG baseline                         |
| APOA5 | 2 | 11:116660983:T:A;<br>11:116661001:G:A                      | 0.000560538,<br>0.000561798                | 0.203037,<br>0.0069579              | 0.312956 | Burden | 0.01 | TG baseline                         |
| APOA5 | 2 | 11:116660983:T:A;<br>11:116661001:G:A                      | 0.000560538,<br>0.000561798                | 0.715625,<br>0.139278               | 0.313709 | SKAT   | 0.05 | LDL baseline                        |
| APOA5 | 2 | 11:116660983:T:A;<br>11:116661001:G:A                      | 0.000560538,<br>0.000561798                | 0.715625,<br>0.139278               | 0.313709 | SKAT   | 0.01 | LDL baseline                        |
| APOA5 | 2 | 11:116660983:T:A;<br>11:116661001:G:A                      | 0.000560538,<br>0.000561798                | 0.203037,<br>0.0069579              | 0.313713 | MB     | 0.05 | TG baseline                         |
| APOA5 | 2 | 11:116660983:T:A;<br>11:116661001:G:A                      | 0.000560538,<br>0.000561798                | 0.203037,<br>0.0069579              | 0.313713 | MB     | 0.01 | TG baseline                         |
| APOC3 | 3 | 11:116701353:C:T;<br>11:116703561:G:C;<br>11:116703575:G:C | 0.000565611,<br>0.00167785,<br>0.00111982  | 0.0639202,<br>0.798134,<br>0.328385 | 0.333394 | SKAT   | 0.05 | TG baseline                         |
| APOC3 | 3 | 11:116701353:C:T;<br>11:116703561:G:C;<br>11:116703575:G:C | 0.000565611,<br>0.00167785,<br>0.00111982  | 0.0639202,<br>0.798134,<br>0.328385 | 0.333394 | SKAT   | 0.01 | TG baseline                         |
| APOA5 | 2 | 11:116660983:T:A;<br>11:116661001:G:A                      | 0.000707214,<br>0.00070922                 | 0.107684,<br>0.797914               | 0.33796  | MB     | 0.05 | TG AUI response to FFB              |
| APOA5 | 2 | 11:116660983:T:A;<br>11:116661001:G:A                      | 0.000707214,<br>0.00070922                 | 0.107684,<br>0.797914               | 0.33796  | MB     | 0.01 | TG AUI response to FFB              |
| APOA5 | 2 | 11:116660983:T:A;<br>11:116661001:G:A                      | 0.000707214,<br>0.00070922                 | 0.107684,<br>0.797914               | 0.338431 | Burden | 0.05 | TG AUI response to FFB              |
| APOA5 | 2 | 11:116660983:T:A;<br>11:116661001:G:A                      | 0.000707214,<br>0.00070922                 | 0.107684,<br>0.797914               | 0.338431 | Burden | 0.01 | TG AUI response to FFB              |
| APOC3 | 3 | 11:116701353:C:T;<br>11:116703561:G:C;<br>11:116703575:G:C | 0.000565611,<br>0.00167785,<br>0.00111982  | 0.599513,<br>0.591086,<br>0.604023  | 0.362428 | MB     | 0.05 | LDL baseline                        |

|       |   |                                                            |                                           |                                    |          |        |      |                                 |
|-------|---|------------------------------------------------------------|-------------------------------------------|------------------------------------|----------|--------|------|---------------------------------|
| APOC3 | 3 | 11:116701353:C:T;<br>11:116703561:G:C;<br>11:116703575:G:C | 0.000565611,<br>0.00167785,<br>0.00111982 | 0.599513,<br>0.591086,<br>0.604023 | 0.362428 | MB     | 0.01 | LDL baseline                    |
| APOC3 | 3 | 11:116701353:C:T;<br>11:116703561:G:C;<br>11:116703575:G:C | 0.000565611,<br>0.00167785,<br>0.00111982 | 0.599513,<br>0.591086,<br>0.604023 | 0.364874 | Burden | 0.05 | LDL baseline                    |
| APOC3 | 3 | 11:116701353:C:T;<br>11:116703561:G:C;<br>11:116703575:G:C | 0.000565611,<br>0.00167785,<br>0.00111982 | 0.599513,<br>0.591086,<br>0.604023 | 0.364874 | Burden | 0.01 | LDL baseline                    |
| APOC3 | 2 | 11:116703561:G:C;<br>11:116703575:G:C                      | 0.00122399,<br>0.00122549                 | 0.414244,<br>0.269892              | 0.386484 | SKAT   | 0.05 | TG clearance                    |
| APOC3 | 2 | 11:116703561:G:C;<br>11:116703575:G:C                      | 0.00122399,<br>0.00122549                 | 0.414244,<br>0.269892              | 0.386484 | SKAT   | 0.01 | TG clearance                    |
| APOC3 | 2 | 11:116703561:G:C;<br>11:116703575:G:C                      | 0.000705219,<br>0.000706215               | 0.958301,<br>0.256569              | 0.406303 | Burden | 0.05 | TG uptake response to FFB       |
| APOC3 | 2 | 11:116703561:G:C;<br>11:116703575:G:C                      | 0.000705219,<br>0.000706215               | 0.958301,<br>0.256569              | 0.406303 | Burden | 0.01 | TG uptake response to FFB       |
| APOC3 | 2 | 11:116703561:G:C;<br>11:116703575:G:C                      | 0.000705219,<br>0.000706215               | 0.958301,<br>0.256569              | 0.406458 | MB     | 0.05 | TG uptake response to FFB       |
| APOC3 | 2 | 11:116703561:G:C;<br>11:116703575:G:C                      | 0.000705219,<br>0.000706215               | 0.958301,<br>0.256569              | 0.406458 | MB     | 0.01 | TG uptake response to FFB       |
| APOA5 | 2 | 11:116660983:T:A;<br>11:116661001:G:A                      | 0.000707214,<br>0.00070922                | 0.337852,<br>0.845436              | 0.414152 | MB     | 0.05 | TG clearance response to<br>FFB |
| APOA5 | 2 | 11:116660983:T:A;<br>11:116661001:G:A                      | 0.000707214,<br>0.00070922                | 0.337852,<br>0.845436              | 0.414152 | MB     | 0.01 | TG clearance response to<br>FFB |
| APOA5 | 2 | 11:116660983:T:A;<br>11:116661001:G:A                      | 0.000707214,<br>0.00070922                | 0.337852,<br>0.845436              | 0.414371 | Burden | 0.05 | TG clearance response to<br>FFB |
| APOA5 | 2 | 11:116660983:T:A;<br>11:116661001:G:A                      | 0.000707214,<br>0.00070922                | 0.337852,<br>0.845436              | 0.414371 | Burden | 0.01 | TG clearance response to<br>FFB |
| APOC3 | 2 | 11:116703561:G:C;<br>11:116703575:G:C                      | 0.00122399,<br>0.00122549                 | 0.400512,<br>0.3071                | 0.416295 | SKAT   | 0.05 | TG uptake                       |
| APOC3 | 2 | 11:116703561:G:C;<br>11:116703575:G:C                      | 0.00122399,<br>0.00122549                 | 0.400512,<br>0.3071                | 0.416295 | SKAT   | 0.01 | TG uptake                       |



|       |   |                                                            |                                            |                                     |          |        |      |                                      |
|-------|---|------------------------------------------------------------|--------------------------------------------|-------------------------------------|----------|--------|------|--------------------------------------|
| APOA5 | 2 | 11:116660983:T:A;<br>11:116661001:G:A                      | 0.000633714,<br>0.000635324                | 0.260847,<br>0.561354               | 0.448957 | SKAT   | 0.05 | TG fasting level response<br>to FFB  |
| APOA5 | 2 | 11:116660983:T:A;<br>11:116661001:G:A                      | 0.000633714,<br>0.000635324                | 0.260847,<br>0.561354               | 0.448957 | SKAT   | 0.01 | TG fasting level response<br>to FFB  |
| APOC3 | 2 | 11:116703561:G:C;<br>11:116703575:G:C                      | 0.000705219,<br>0.000706215                | 0.781578,<br>0.229502               | 0.468632 | SKAT   | 0.01 | TG clearance response to<br>FFB      |
| APOC3 | 3 | 11:116701353:C:T;<br>11:116703561:G:C;<br>11:116703575:G:C | 0.000640205,<br>0.00126422,<br>0.000632911 | 0.365117,<br>0.835961,<br>0.161165  | 0.501333 | SKAT   | 0.05 | HDL fasting level response<br>to FFB |
| APOC3 | 3 | 11:116701353:C:T;<br>11:116703561:G:C;<br>11:116703575:G:C | 0.000640205,<br>0.00126422,<br>0.000632911 | 0.365117,<br>0.835961,<br>0.161165  | 0.501333 | SKAT   | 0.01 | HDL fasting level response<br>to FFB |
| APOC3 | 2 | 11:116703561:G:C;<br>11:116703575:G:C                      | 0.000705219,<br>0.000706215                | 0.781578,<br>0.229502               | 0.514237 | Burden | 0.05 | TG clearance response to<br>FFB      |
| APOC3 | 2 | 11:116703561:G:C;<br>11:116703575:G:C                      | 0.000705219,<br>0.000706215                | 0.781578,<br>0.229502               | 0.514237 | Burden | 0.01 | TG clearance response to<br>FFB      |
| APOC3 | 2 | 11:116703561:G:C;<br>11:116703575:G:C                      | 0.000705219,<br>0.000706215                | 0.781578,<br>0.229502               | 0.514475 | MB     | 0.05 | TG clearance response to<br>FFB      |
| APOC3 | 2 | 11:116703561:G:C;<br>11:116703575:G:C                      | 0.000705219,<br>0.000706215                | 0.781578,<br>0.229502               | 0.514475 | MB     | 0.01 | TG clearance response to<br>FFB      |
| APOC3 | 2 | 11:116703561:G:C;<br>11:116703575:G:C                      | 0.000705219,<br>0.000706215                | 0.958301,<br>0.256569               | 0.532881 | SKAT   | 0.05 | TG uptake response to FFB            |
| APOC3 | 2 | 11:116703561:G:C;<br>11:116703575:G:C                      | 0.000705219,<br>0.000706215                | 0.958301,<br>0.256569               | 0.532881 | SKAT   | 0.01 | TG uptake response to FFB            |
| APOC3 | 3 | 11:116701353:C:T;<br>11:116703561:G:C;<br>11:116703575:G:C | 0.000565611,<br>0.00167785,<br>0.00111982  | 0.0928598,<br>0.214563,<br>0.295312 | 0.53628  | Burden | 0.05 | HDL baseline                         |
| APOC3 | 3 | 11:116701353:C:T;<br>11:116703561:G:C;<br>11:116703575:G:C | 0.000565611,<br>0.00167785,<br>0.00111982  | 0.0928598,<br>0.214563,<br>0.295312 | 0.53628  | Burden | 0.01 | HDL baseline                         |
| APOC3 | 3 | 11:116701353:C:T;<br>11:116703561:G:C;<br>11:116703575:G:C | 0.000640205,<br>0.00126422,<br>0.000632911 | 0.852299,<br>0.431323,<br>0.430186  | 0.547126 | VT     | 0.01 | TG fasting level response<br>to FFB  |

|       |   |                                                            |                                            |                                    |          |        |      |                                      |
|-------|---|------------------------------------------------------------|--------------------------------------------|------------------------------------|----------|--------|------|--------------------------------------|
| APOC3 | 2 | 11:116703561:G:C;<br>11:116703575:G:C                      | 0.000705219,<br>0.000706215                | 0.958301,<br>0.256569              | 0.574537 | VT     | 0.01 | TG uptake response to FFB            |
| APOA5 | 2 | 11:116660983:T:A;<br>11:116661001:G:A                      | 0.000707214,<br>0.00070922                 | 0.337852,<br>0.845436              | 0.619832 | SKAT   | 0.01 | TG clearance response to<br>FFB      |
| APOC3 | 3 | 11:116701353:C:T;<br>11:116703561:G:C;<br>11:116703575:G:C | 0.000565611,<br>0.00167785,<br>0.00111982  | 0.599513,<br>0.591086,<br>0.604023 | 0.650545 | VT     | 0.01 | LDL baseline                         |
| APOC3 | 3 | 11:116701353:C:T;<br>11:116703561:G:C;<br>11:116703575:G:C | 0.000640205,<br>0.00126422,<br>0.000632911 | 0.852299,<br>0.431323,<br>0.430186 | 0.693764 | SKAT   | 0.05 | TG fasting level response<br>to FFB  |
| APOC3 | 3 | 11:116701353:C:T;<br>11:116703561:G:C;<br>11:116703575:G:C | 0.000640205,<br>0.00126422,<br>0.000632911 | 0.852299,<br>0.431323,<br>0.430186 | 0.693764 | SKAT   | 0.01 | TG fasting level response<br>to FFB  |
| APOA5 | 2 | 11:116660983:T:A;<br>11:116661001:G:A                      | 0.000633714,<br>0.000635324                | 0.260847,<br>0.561354              | 0.699926 | MB     | 0.05 | TG fasting level response<br>to FFB  |
| APOA5 | 2 | 11:116660983:T:A;<br>11:116661001:G:A                      | 0.000633714,<br>0.000635324                | 0.260847,<br>0.561354              | 0.699926 | MB     | 0.01 | TG fasting level response<br>to FFB  |
| APOA5 | 2 | 11:116660983:T:A;<br>11:116661001:G:A                      | 0.000633714,<br>0.000635324                | 0.260847,<br>0.561354              | 0.700493 | Burden | 0.05 | TG fasting level response<br>to FFB  |
| APOA5 | 2 | 11:116660983:T:A;<br>11:116661001:G:A                      | 0.000633714,<br>0.000635324                | 0.260847,<br>0.561354              | 0.700493 | Burden | 0.01 | TG fasting level response<br>to FFB  |
| APOC3 | 2 | 11:116703561:G:C;<br>11:116703575:G:C                      | 0.000705219,<br>0.000706215                | 0.781578,<br>0.229502              | 0.702109 | VT     | 0.01 | TG clearance response to<br>FFB      |
| APOC3 | 3 | 11:116701353:C:T;<br>11:116703561:G:C;<br>11:116703575:G:C | 0.000640205,<br>0.00126422,<br>0.000632911 | 0.330222,<br>0.613145,<br>0.800372 | 0.740336 | SKAT   | 0.05 | LDL fasting level response<br>to FFB |
| APOC3 | 3 | 11:116701353:C:T;<br>11:116703561:G:C;<br>11:116703575:G:C | 0.000640205,<br>0.00126422,<br>0.000632911 | 0.330222,<br>0.613145,<br>0.800372 | 0.740336 | SKAT   | 0.01 | LDL fasting level response<br>to FFB |
| APOC3 | 2 | 11:116703561:G:C;<br>11:116703575:G:C                      | 0.000705219,<br>0.000706215                | 0.758373,<br>0.501067              | 0.761221 | SKAT   | 0.05 | TG AUI response to FFB               |
| APOC3 | 2 | 11:116703561:G:C;<br>11:116703575:G:C                      | 0.000705219,<br>0.000706215                | 0.758373,<br>0.501067              | 0.761221 | SKAT   | 0.01 | TG AUI response to FFB               |

|       |   |                                       |                             |                        |          |        |      |                           |
|-------|---|---------------------------------------|-----------------------------|------------------------|----------|--------|------|---------------------------|
| APOA5 | 2 | 11:116660983:T:A;<br>11:116661001:G:A | 0.000613497,<br>0.000615006 | 0.0691347,<br>0.157579 | 0.773747 | MB     | 0.05 | TG clearance              |
| APOA5 | 2 | 11:116660983:T:A;<br>11:116661001:G:A | 0.000613497,<br>0.000615006 | 0.0691347,<br>0.157579 | 0.773747 | MB     | 0.01 | TG clearance              |
| APOA5 | 2 | 11:116660983:T:A;<br>11:116661001:G:A | 0.000613497,<br>0.000615006 | 0.0691347,<br>0.157579 | 0.774822 | Burden | 0.05 | TG clearance              |
| APOA5 | 2 | 11:116660983:T:A;<br>11:116661001:G:A | 0.000613497,<br>0.000615006 | 0.0691347,<br>0.157579 | 0.774822 | Burden | 0.01 | TG clearance              |
| APOA5 | 2 | 11:116660983:T:A;<br>11:116661001:G:A | 0.000707214,<br>0.00070922  | 0.814984,<br>0.546985  | 0.794356 | Burden | 0.05 | TG uptake response to FFB |
| APOA5 | 2 | 11:116660983:T:A;<br>11:116661001:G:A | 0.000707214,<br>0.00070922  | 0.814984,<br>0.546985  | 0.794356 | Burden | 0.01 | TG uptake response to FFB |
| APOA5 | 2 | 11:116660983:T:A;<br>11:116661001:G:A | 0.000707214,<br>0.00070922  | 0.814984,<br>0.546985  | 0.794679 | MB     | 0.05 | TG uptake response to FFB |
| APOA5 | 2 | 11:116660983:T:A;<br>11:116661001:G:A | 0.000707214,<br>0.00070922  | 0.814984,<br>0.546985  | 0.794679 | MB     | 0.01 | TG uptake response to FFB |
| APOC3 | 2 | 11:116703561:G:C;<br>11:116703575:G:C | 0.000705219,<br>0.000706215 | 0.758373,<br>0.501067  | 0.797299 | Burden | 0.05 | TG AUI response to FFB    |
| APOC3 | 2 | 11:116703561:G:C;<br>11:116703575:G:C | 0.000705219,<br>0.000706215 | 0.758373,<br>0.501067  | 0.797299 | Burden | 0.01 | TG AUI response to FFB    |
| APOC3 | 2 | 11:116703561:G:C;<br>11:116703575:G:C | 0.000705219,<br>0.000706215 | 0.758373,<br>0.501067  | 0.797488 | MB     | 0.05 | TG AUI response to FFB    |
| APOC3 | 2 | 11:116703561:G:C;<br>11:116703575:G:C | 0.000705219,<br>0.000706215 | 0.758373,<br>0.501067  | 0.797488 | MB     | 0.01 | TG AUI response to FFB    |
| APOA5 | 2 | 11:116660983:T:A;<br>11:116661001:G:A | 0.000707214,<br>0.00070922  | 0.814984,<br>0.546985  | 0.811603 | SKAT   | 0.05 | TG uptake response to FFB |
| APOA5 | 2 | 11:116660983:T:A;<br>11:116661001:G:A | 0.000707214,<br>0.00070922  | 0.814984,<br>0.546985  | 0.811603 | SKAT   | 0.01 | TG uptake response to FFB |
| APOC3 | 2 | 11:116703561:G:C;<br>11:116703575:G:C | 0.00122399,<br>0.00122549   | 0.414244,<br>0.269892  | 0.823182 | Burden | 0.05 | TG clearance              |
| APOC3 | 2 | 11:116703561:G:C;<br>11:116703575:G:C | 0.00122399,<br>0.00122549   | 0.414244,<br>0.269892  | 0.823182 | Burden | 0.01 | TG clearance              |
| APOC3 | 2 | 11:116703561:G:C;<br>11:116703575:G:C | 0.00122399,<br>0.00122549   | 0.414244,<br>0.269892  | 0.823504 | MB     | 0.05 | TG clearance              |

|       |   |                                                            |                                            |                                    |          |        |      |                                      |
|-------|---|------------------------------------------------------------|--------------------------------------------|------------------------------------|----------|--------|------|--------------------------------------|
| APOC3 | 2 | 11:116703561:G:C;<br>11:116703575:G:C                      | 0.00122399,<br>0.00122549                  | 0.414244,<br>0.269892              | 0.823504 | MB     | 0.01 | TG clearance                         |
| APOC3 | 3 | 11:116701353:C:T;<br>11:116703561:G:C;<br>11:116703575:G:C | 0.000565611,<br>0.00167785,<br>0.00111982  | 0.599513,<br>0.591086,<br>0.604023 | 0.835549 | SKAT   | 0.05 | LDL baseline                         |
| APOC3 | 3 | 11:116701353:C:T;<br>11:116703561:G:C;<br>11:116703575:G:C | 0.000565611,<br>0.00167785,<br>0.00111982  | 0.599513,<br>0.591086,<br>0.604023 | 0.835549 | SKAT   | 0.01 | LDL baseline                         |
| APOC3 | 3 | 11:116701353:C:T;<br>11:116703561:G:C;<br>11:116703575:G:C | 0.000640205,<br>0.00126422,<br>0.000632911 | 0.330222,<br>0.613145,<br>0.800372 | 0.872221 | MB     | 0.05 | LDL fasting level response<br>to FFB |
| APOC3 | 3 | 11:116701353:C:T;<br>11:116703561:G:C;<br>11:116703575:G:C | 0.000640205,<br>0.00126422,<br>0.000632911 | 0.330222,<br>0.613145,<br>0.800372 | 0.872221 | MB     | 0.01 | LDL fasting level response<br>to FFB |
| APOC3 | 2 | 11:116701353:C:T;<br>11:116703575:G:C                      | 0.000640205,<br>0.000632911                | 0.330222,<br>0.800372              | 0.887423 | VT     | 0.01 | LDL fasting level response<br>to FFB |
| APOA5 | 2 | 11:116660983:T:A;<br>11:116661001:G:A                      | 0.000707214,<br>0.00070922                 | 0.814984,<br>0.546985              | 0.941536 | VT     | 0.01 | TG uptake response to FFB            |
| APOC3 | 3 | 11:116701353:C:T;<br>11:116703561:G:C;<br>11:116703575:G:C | 0.000640205,<br>0.00126422,<br>0.000632911 | 0.330222,<br>0.613145,<br>0.800372 | 0.965708 | Burden | 0.05 | LDL fasting level response<br>to FFB |
| APOC3 | 3 | 11:116701353:C:T;<br>11:116703561:G:C;<br>11:116703575:G:C | 0.000640205,<br>0.00126422,<br>0.000632911 | 0.330222,<br>0.613145,<br>0.800372 | 0.965708 | Burden | 0.01 | LDL fasting level response<br>to FFB |

Supplemental Table S5 Single variant association results for SIPA1L2 with GOLDN and HAPI Heart Study for the trait of triglyceride postprandial area under increase.

| gene    | chr | variant position | reference allele | alternative allele | number of samples analyzed | minor allele frequency | P value  | cohort | mutation effect | direction of effect |
|---------|-----|------------------|------------------|--------------------|----------------------------|------------------------|----------|--------|-----------------|---------------------|
| SIPA1L2 | 1   | 232534919        | C                | T                  | 803                        | 0.00996                | 0.117317 | GOLDN  | Missense        | +                   |
| SIPA1L2 | 1   | 232538214        | C                | T                  | 799                        | 0.00313                | 0.815151 | GOLDN  | Missense        | +                   |
| SIPA1L2 | 1   | 232539219        | C                | T                  | 728                        | 0.0158                 | 0.738418 | HAPI   | Missense        | +                   |
| SIPA1L2 | 1   | 232539219        | C                | T                  | 812                        | 0.00554                | 0.999854 | GOLDN  | Missense        | -                   |
| SIPA1L2 | 1   | 232539246        | G                | T                  | 813                        | 0.00062                | 0.434327 | GOLDN  | Missense        | +                   |
| SIPA1L2 | 1   | 232539255        | C                | A                  | 815                        | 0.00184                | 0.216915 | GOLDN  | Missense        | +                   |
| SIPA1L2 | 1   | 232561520        | G                | A                  | 797                        | 0.00565                | 0.199456 | GOLDN  | Missense        | +                   |
| SIPA1L2 | 1   | 232564162        | T                | C                  | 728                        | 0.02198                | 0.101433 | HAPI   | Missense        | +                   |
| SIPA1L2 | 1   | 232564162        | T                | C                  | 817                        | 0.0202                 | 0.885149 | GOLDN  | Missense        | +                   |
| SIPA1L2 | 1   | 232564197        | A                | G                  | 817                        | 0.00245                | 0.069999 | GOLDN  | Missense        | +                   |
| SIPA1L2 | 1   | 232564288        | T                | G                  | 728                        | 0.00137                | 0.800378 | HAPI   | Missense        | -                   |
| SIPA1L2 | 1   | 232564288        | T                | G                  | 817                        | 0.00734                | 0.262417 | GOLDN  | Missense        | +                   |
| SIPA1L2 | 1   | 232564297        | T                | A                  | 728                        | 0.23764                | 0.83474  | HAPI   | Missense        | +                   |
| SIPA1L2 | 1   | 232564297        | T                | A                  | 817                        | 0.19584                | 0.444758 | GOLDN  | Missense        | +                   |
| SIPA1L2 | 1   | 232568041        | G                | A                  | 728                        | 0.11607                | 0.703457 | HAPI   | Missense        | +                   |
| SIPA1L2 | 1   | 232568041        | G                | A                  | 815                        | 0.1092                 | 0.091871 | GOLDN  | Missense        | -                   |
| SIPA1L2 | 1   | 232568146        | A                | C                  | 817                        | 0.00122                | 0.117251 | GOLDN  | Missense        | +                   |
| SIPA1L2 | 1   | 232574921        | T                | C                  | 728                        | 0.25962                | 0.966404 | HAPI   | Missense        | +                   |
| SIPA1L2 | 1   | 232574968        | G                | C                  | 780                        | 0.00128                | 0.593174 | GOLDN  | Missense        | +                   |
| SIPA1L2 | 1   | 232575166        | T                | C                  | 816                        | 0.00061                | 0.425115 | GOLDN  | Missense        | -                   |
| SIPA1L2 | 1   | 232581366        | C                | T                  | 811                        | 0.00247                | 0.097609 | GOLDN  | Missense        | +                   |
| SIPA1L2 | 1   | 232600762        | T                | C                  | 797                        | 0.00063                | 0.217873 | GOLDN  | Missense        | +                   |
| SIPA1L2 | 1   | 232600796        | A                | C                  | 793                        | 0.00063                | 0.243738 | GOLDN  | Missense        | +                   |

|         |   |           |   |   |     |         |          |       |          |   |
|---------|---|-----------|---|---|-----|---------|----------|-------|----------|---|
| SIPA1L2 | 1 | 232615429 | C | T | 817 | 0.00122 | 0.583783 | GOLDN | Missense | + |
| SIPA1L2 | 1 | 232626760 | C | T | 816 | 0.00245 | 0.068269 | GOLDN | Missense | + |
| SIPA1L2 | 1 | 232649974 | G | A | 728 | 0.00069 | 0.844218 | HAPI  | Missense | + |
| SIPA1L2 | 1 | 232650253 | A | C | 805 | 0.00062 | 0.879694 | GOLDN | Missense | + |
| SIPA1L2 | 1 | 232650307 | C | G | 815 | 0.00184 | 0.042398 | GOLDN | Missense | + |
| SIPA1L2 | 1 | 232650454 | A | G | 817 | 0.00245 | 0.647498 | GOLDN | Missense | + |
| SIPA1L2 | 1 | 232650624 | G | T | 814 | 0.00061 | 0.376787 | GOLDN | Missense | + |
| SIPA1L2 | 1 | 232650662 | C | T | 814 | 0.00123 | 0.884476 | GOLDN | Missense | - |
| SIPA1L2 | 1 | 232650941 | T | C | 811 | 0.00062 | 0.004215 | GOLDN | Missense | + |

Supplemental Table S6 Gene-based association results for SIPA1L2 with GOLDN and HAPI Heart Study for the trait of triglyceride postprandial area under increase.

| Joint meta-analysis<br>of HAPI and<br>GOLDN | GOLDN    |           |          | HAPI     |          |           |          |          |          |    |          |
|---------------------------------------------|----------|-----------|----------|----------|----------|-----------|----------|----------|----------|----|----------|
|                                             | Burden   | MB        | SKAT     | VT       | Burden   | MB        | SKAT     | VT       | Burden   | MB | SKAT     |
| 6.31E-06                                    | 1.73E-06 | 0.0739029 | 2.86E-05 | 6.38E-06 | 2.31E-06 | 0.0713718 | 1.79E-04 | 0.925908 | 0.968225 | 1  | 0.970485 |
